# Supplementary material
Source: MDPI journal article supplement (https://www.mdpi.com/2077-1312/10/2/183)
Supplement: s1 [file s1]

Article

# Atmospheric Drivers of Oceanic North Swells in the Eastern Caribbean

Timothy W. Hawkins <sup>1,\*</sup>, Isabelle Gouirand <sup>2</sup>, Theodore Allen <sup>3</sup> and Ali Belmadani <sup>4</sup>

<sup>1</sup> Department of Geography and Earth Science, Shippensburg University, Shippensburg, PA 17257, USA

<sup>2</sup> The University of the West Indies, Cave Hill Campus, Barbados; isabelle.gouirand@cavehill.uwi.edu

<sup>3</sup> Caribbean Institute for Meteorology and Hydrology, Bridgetown, Barbados; tallen@cimh.edu.bb

<sup>4</sup> Météo-France, Direction Interrégionale Antilles-Guyane, 97200 Fort-de-France, Martinique, France; ali.belmadani@meteo.fr

\* Correspondence: twhawk@ship.edu

**Citation:** Hawkins, T.W.; Gouirand, I.; Allen, T.; Belmadani, A. Atmospheric Drivers of Oceanic North Swells in the Eastern Caribbean. *J. Mar. Sci. Eng.* **2022**, *10*, 183. <https://doi.org/10.3390/jmse10020183>

Academic Editor: Alfredo L. Aretxabaleta

Received: 31 December 2021

Accepted: 27 January 2022

Published: 29 January 2022

**Publisher's Note:** MDPI stays neutral with regard to jurisdictional claims in published maps and institutional affiliations.

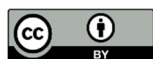

**Copyright:** © 2022 by the authors. Submitted for possible open access publication under the terms and conditions of the Creative Commons Attribution (CC BY) license (<https://creativecommons.org/licenses/by/4.0/>).

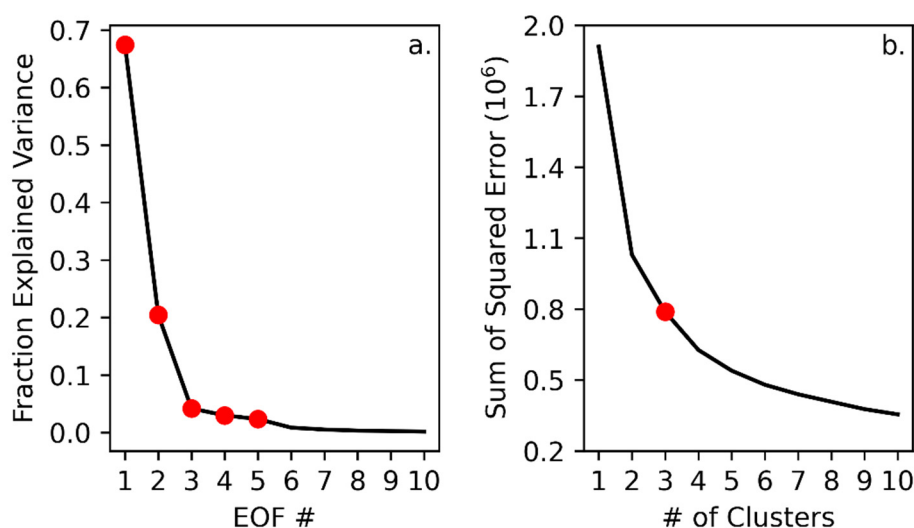

**Figure S1.** (a) Fraction of explained variance for each EOF. (b) Sum of squared error for each set of clusters. For both panels, red points represent the selected EOF's or number of clusters.

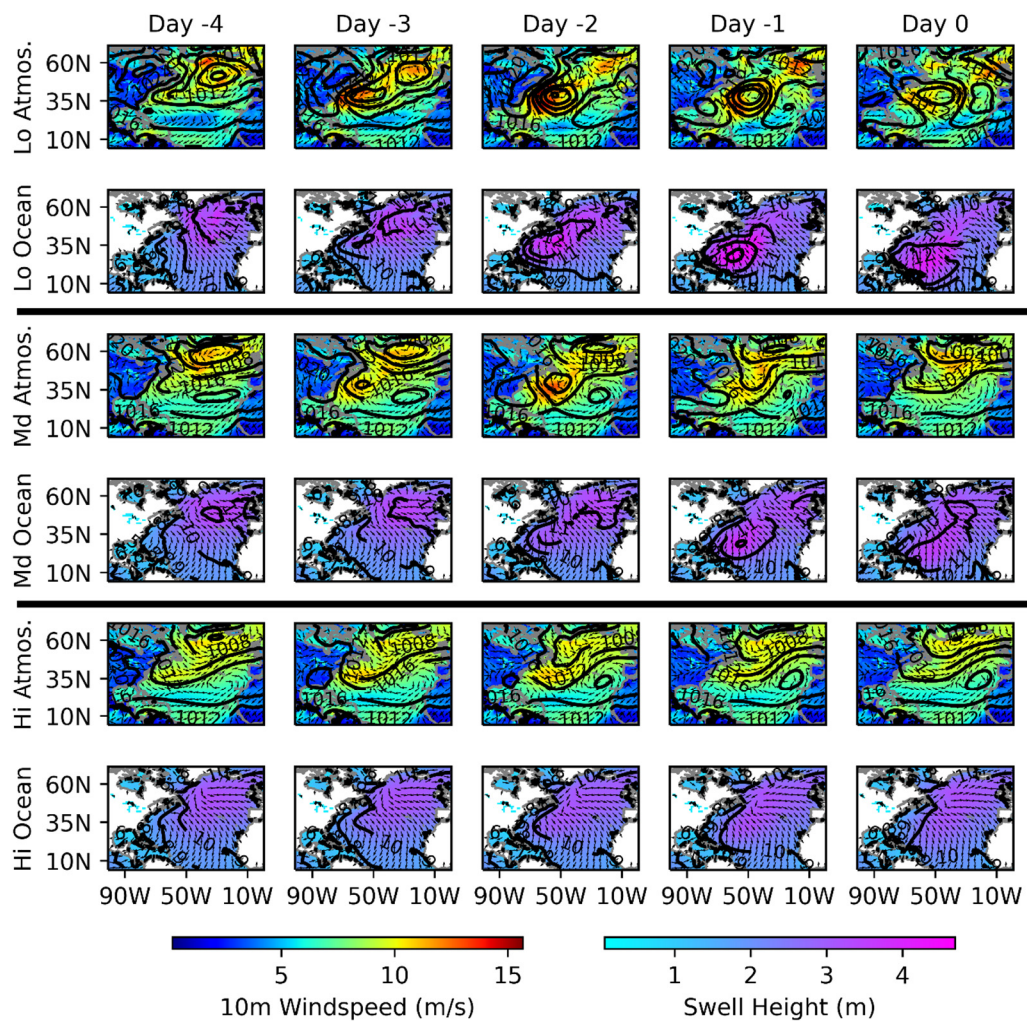

**Figure S2.** Atmosphere (rows 1, 3, and 5) and ocean swell (rows 2, 4, and 6) composite averages for low probability north swell events (Lo; rows 1–2; 12 days composited), medium probability north swell events (Md; rows 3–4; 73 days composited), and high probability north swell events (Hi; rows 5–6; 1007 days composited). Probabilities are defined as: Lo < 0.25,  $0.25 \leq \text{Md} \leq 0.75$ , Hi > 0.75. Shading is the surface wind speed or swell height. Contours are the sea level pressure or swell period. Vectors are the surface wind or swell direction. Day 0 is the day that was classified as belonging to one of the three swell probability groups. Days –1 to –4 represent the 4 days prior to Day 0. Anomalies in figure 11 are based on these composite averages.

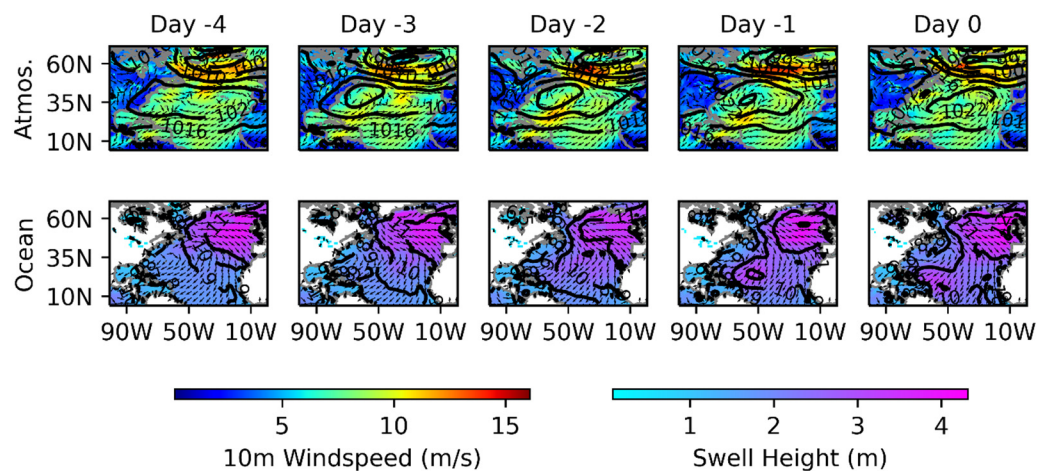

**Figure S3.** Same as Figure S2 except composite averages for high pressure induced, medium probability north swell events (10 days composited per map). Day 0 is the day that was classified as a north swell day. Anomalies in figure 14 are based on these composite averages.

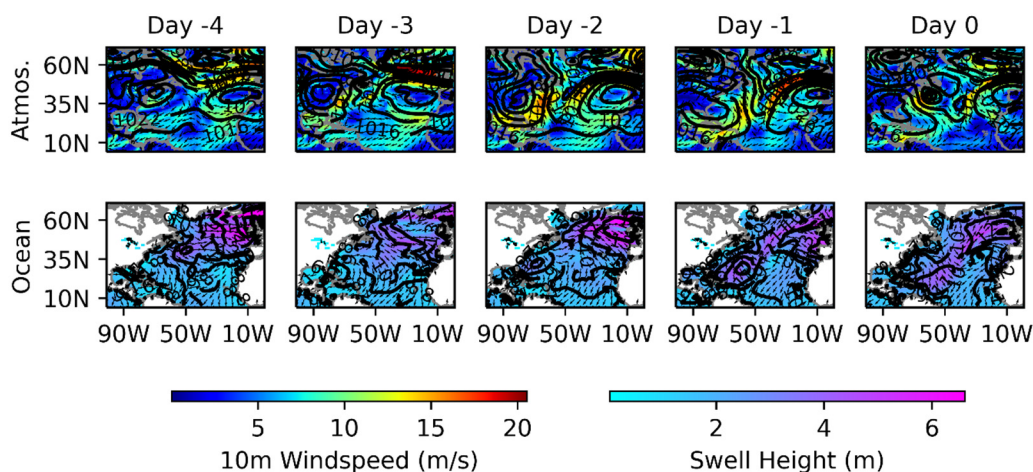

**Figure S4.** Same as Figure S2 except high pressure induced low probability north swell event (day 0 = 12/22/1991). Day 0 is the day that was classified as a north swell day. Anomalies in figure 15 are based on these composite averages.

**Table S1.** North swell events, ranked by maximum swell height in the eastern Caribbean for the 59 events with a probability less than 0.75. Max Height is the largest, daily, spatially averaged swell height during the event. Max Height Period and Dir. are the daily spatially averaged swell period and direction on the Max Height Date. Max Height Prob. is the GEV probability of the Max Height. Avg Height, Period and Dir. are the average of the daily spatially averaged values of swell height, period, and direction over the duration of the event. Table break separates low and medium probability events.

| Rank | Start Date | End Date   | Days | Max Height (m) | Max Height Date | Max Height Period (s) | Max Height Dir. (°) | Max Height Prob. | Avg Height (m) | Avg Period (s) | Avg Dir. (°) |
|------|------------|------------|------|----------------|-----------------|-----------------------|---------------------|------------------|----------------|----------------|--------------|
| 1    | 3/19/2008  | 3/22/2008  | 4    | 4.5            | 3/20/2008       | 14.1                  | 359                 | 0.005            | 3.5            | 12.6           | 3            |
| 2    | 3/4/2018   | 3/9/2018   | 6    | 4.0            | 3/5/2018        | 13.4                  | 336                 | 0.035            | 3.1            | 12.3           | 354          |
| 3    | 2/2/1999   | 2/4/1999   | 3    | 3.7            | 2/3/1999        | 12.5                  | 8                   | 0.083            | 3.4            | 11.7           | 10           |
| 4    | 12/27/2009 | 12/31/2009 | 5    | 3.7            | 12/29/2009      | 13.8                  | 29                  | 0.095            | 2.9            | 11.9           | 26           |
| *5   | 12/21/1991 | 12/25/1991 | 5    | 3.6            | 12/22/1991      | 11.3                  | 357                 | 0.112            | 2.7            | 10.7           | 1            |
| 6    | 1/13/2013  | 1/16/2013  | 4    | 3.5            | 1/14/2013       | 13.3                  | 11                  | 0.153            | 2.9            | 11.7           | 14           |
| 7    | 11/24/1980 | 11/28/1980 | 5    | 3.5            | 11/25/1980      | 12.9                  | 3                   | 0.161            | 2.7            | 11.5           | 19           |
| 8    | 11/27/1981 | 11/30/1981 | 4    | 3.4            | 11/28/1981      | 12.7                  | 353                 | 0.230            | 2.8            | 11.5           | 4            |
| 9    | 3/9/2013   | 3/16/2013  | 8    | 3.4            | 3/11/2013       | 12.9                  | 359                 | 0.238            | 2.7            | 11.8           | 9            |
| 10   | 2/12/2010  | 2/15/2010  | 4    | 3.4            | 2/13/2010       | 13.4                  | 337                 | 0.251            | 2.3            | 11.1           | 349          |
| 11   | 12/22/2010 | 12/25/2010 | 4    | 3.4            | 12/23/2010      | 12.8                  | 346                 | 0.253            | 2.7            | 11.5           | 355          |
| 12   | 1/11/2016  | 1/16/2016  | 6    | 3.4            | 1/13/2016       | 13.2                  | 28                  | 0.254            | 2.6            | 11.8           | 27           |
| 13   | 1/16/2000  | 1/19/2000  | 4    | 3.3            | 1/17/2000       | 10.9                  | 352                 | 0.277            | 2.8            | 10.6           | 3            |
| 14   | 11/1/1991  | 11/3/1991  | 3    | 3.3            | 11/1/1991       | 13.4                  | 3                   | 0.292            | 2.7            | 11.4           | 15           |
| 15   | 11/18/1996 | 11/21/1996 | 4    | 3.3            | 11/19/1996      | 12.4                  | 5                   | 0.318            | 2.7            | 11.1           | 12           |
| 16   | 2/22/2018  | 2/23/2018  | 2    | 3.3            | 2/22/2018       | 11.6                  | 35                  | 0.343            | 3.2            | 11.3           | 39           |
| 17   | 1/18/1988  | 1/20/1988  | 3    | 3.3            | 1/19/1988       | 11.9                  | 4                   | 0.349            | 2.9            | 11.1           | 6            |
| **18 | 1/11/2017  | 1/15/2017  | 5    | 3.2            | 1/13/2017       | 11.0                  | 10                  | 0.360            | 2.8            | 10.3           | 13           |
| **19 | 2/13/1981  | 2/14/1981  | 2    | 3.2            | 2/13/1981       | 11.1                  | 54                  | 0.369            | 3.1            | 10.9           | 59           |

|      |            |            |   |     |            |      |     |       |     |      |     |
|------|------------|------------|---|-----|------------|------|-----|-------|-----|------|-----|
| **20 | 11/22/1992 | 11/24/1992 | 3 | 3.2 | 11/23/1992 | 10.8 | 30  | 0.373 | 3.0 | 10.4 | 32  |
| 21   | 2/27/2001  | 3/2/2001   | 4 | 3.2 | 2/27/2001  | 11.7 | 11  | 0.373 | 2.7 | 11.4 | 10  |
| **22 | 3/7/2009   | 3/10/2009  | 4 | 3.2 | 3/9/2009   | 10.9 | 25  | 0.374 | 2.7 | 10.1 | 27  |
| 23   | 12/24/1983 | 12/28/1983 | 5 | 3.2 | 12/24/1983 | 11.7 | 26  | 0.408 | 2.8 | 11.1 | 32  |
| 24   | 1/6/1989   | 1/8/1989   | 3 | 3.2 | 1/7/1989   | 11.8 | 357 | 0.417 | 2.9 | 11.4 | 3   |
| 25   | 4/18/2017  | 4/19/2017  | 2 | 3.2 | 4/18/2017  | 12.3 | 22  | 0.435 | 2.9 | 11.7 | 24  |
| 26   | 1/5/1982   | 1/8/1982   | 4 | 3.2 | 1/5/1982   | 12.3 | 14  | 0.455 | 2.9 | 11.5 | 23  |
| 27   | 12/29/2010 | 1/1/2011   | 4 | 3.2 | 12/30/2010 | 12.0 | 347 | 0.456 | 2.7 | 10.9 | 357 |
| 28   | 2/21/2016  | 2/23/2016  | 3 | 3.1 | 2/22/2016  | 11.3 | 40  | 0.467 | 2.8 | 10.8 | 45  |
| 29   | 11/10/1984 | 11/14/1984 | 5 | 3.1 | 11/12/1984 | 11.9 | 9   | 0.475 | 2.6 | 10.7 | 4   |
| **30 | 12/29/1998 | 12/29/1998 | 1 | 3.1 | 12/29/1998 | 10.3 | 86  | 0.484 | 3.1 | 10.3 | 86  |
| 31   | 12/10/2014 | 12/14/2014 | 5 | 3.1 | 12/11/2014 | 12.0 | 25  | 0.501 | 2.6 | 11.2 | 36  |
| 32   | 2/19/1983  | 2/24/1983  | 6 | 3.1 | 2/23/1983  | 11.7 | 1   | 0.511 | 2.6 | 11.6 | 9   |
| 33   | 2/22/2011  | 2/23/2011  | 2 | 3.1 | 2/22/2011  | 12.0 | 357 | 0.537 | 2.8 | 11.2 | 2   |
| 34   | 3/9/1981   | 3/13/1981  | 5 | 3.1 | 3/10/1981  | 12.1 | 355 | 0.554 | 2.7 | 11.9 | 8   |
| 35   | 1/17/2006  | 1/19/2006  | 3 | 3.1 | 1/17/2006  | 11.2 | 7   | 0.561 | 2.8 | 10.8 | 24  |
| 36   | 2/19/2009  | 2/21/2009  | 3 | 3.0 | 2/20/2009  | 11.4 | 16  | 0.573 | 2.8 | 10.9 | 22  |
| 37   | 2/17/2015  | 2/19/2015  | 3 | 3.0 | 2/18/2015  | 11.9 | 357 | 0.578 | 2.6 | 10.8 | 13  |
| 38   | 3/28/2014  | 3/30/2014  | 3 | 3.0 | 3/29/2014  | 11.2 | 14  | 0.585 | 2.5 | 10.6 | 20  |
| 39   | 1/1/1988   | 1/2/1988   | 2 | 3.0 | 1/1/1988   | 11.4 | 0   | 0.590 | 3.0 | 11.1 | 9   |
| 40   | 1/6/2018   | 1/9/2018   | 4 | 3.0 | 1/7/2018   | 11.0 | 25  | 0.607 | 2.7 | 10.5 | 39  |
| **41 | 1/16/2005  | 1/17/2005  | 2 | 3.0 | 1/17/2005  | 10.2 | 71  | 0.607 | 3.0 | 10.1 | 72  |
| **42 | 2/27/2000  | 3/2/2000   | 5 | 3.0 | 2/29/2000  | 11.8 | 29  | 0.614 | 2.5 | 10.6 | 29  |
| **43 | 11/7/1997  | 11/8/1997  | 2 | 3.0 | 11/7/1997  | 11.7 | 43  | 0.620 | 2.7 | 11.3 | 44  |
| 44   | 1/1/2010   | 1/2/2010   | 2 | 3.0 | 1/1/2010   | 11.3 | 7   | 0.622 | 2.9 | 11.0 | 17  |
| 45   | 11/26/2001 | 11/30/2001 | 5 | 3.0 | 11/27/2001 | 12.0 | 14  | 0.625 | 2.5 | 10.7 | 12  |
| 46   | 11/12/2004 | 11/16/2004 | 5 | 3.0 | 11/13/2004 | 10.9 | 19  | 0.635 | 2.6 | 10.3 | 24  |
| 47   | 2/4/1993   | 2/7/1993   | 4 | 3.0 | 2/5/1993   | 11.7 | 353 | 0.654 | 2.3 | 10.2 | 6   |
| 48   | 4/3/1997   | 4/6/1997   | 4 | 3.0 | 4/4/1997   | 12.3 | 340 | 0.656 | 2.6 | 11.2 | 351 |
| **49 | 2/6/1982   | 2/7/1982   | 2 | 3.0 | 2/7/1982   | 10.5 | 66  | 0.657 | 2.9 | 10.5 | 65  |
| **50 | 1/28/2018  | 1/31/2018  | 4 | 3.0 | 1/30/2018  | 10.3 | 45  | 0.683 | 2.7 | 10.3 | 35  |
| 51   | 3/3/2002   | 3/6/2002   | 4 | 2.9 | 3/5/2002   | 10.6 | 38  | 0.692 | 2.6 | 10.2 | 33  |
| 52   | 3/12/2009  | 3/15/2009  | 4 | 2.9 | 3/13/2009  | 11.4 | 9   | 0.703 | 2.5 | 10.4 | 20  |
| 53   | 1/25/2003  | 1/27/2003  | 3 | 2.9 | 1/26/2003  | 11.4 | 348 | 0.716 | 2.5 | 10.6 | 6   |
| 54   | 12/13/2001 | 12/15/2001 | 3 | 2.9 | 12/14/2001 | 11.6 | 41  | 0.717 | 2.9 | 11.1 | 48  |
| 55   | 11/4/1986  | 11/5/1986  | 2 | 2.9 | 11/4/1986  | 11.4 | 33  | 0.730 | 2.7 | 11.0 | 35  |
| 56   | 1/18/2004  | 1/20/2004  | 3 | 2.9 | 1/19/2004  | 12.0 | 352 | 0.730 | 2.6 | 11.5 | 356 |
| 57   | 3/6/1981   | 3/8/1981   | 3 | 2.9 | 3/6/1981   | 12.7 | 356 | 0.736 | 2.3 | 11.2 | 356 |
| 58   | 1/20/2007  | 1/24/2007  | 5 | 2.9 | 1/23/2007  | 11.6 | 358 | 0.739 | 2.3 | 10.3 | 16  |
| 59   | 2/10/1980  | 2/12/1980  | 3 | 2.9 | 2/10/1980  | 11.7 | 356 | 0.745 | 2.6 | 11.1 | 10  |

\* Low probability event with no associated storm. \*\* Medium probability event with no associated storm.
